# Supplementary material for: Genetic parameters and correlations of related feed efficiency, growth, and carcass traits in Hanwoo beef cattle
Source: PubMed Central journal article supplement (PMC8100466; doi:10.5713/ajas.20.0135), 2020-08-30
Supplement: ajas-20-0135-suppl.pdf [file ajas-20-0135-suppl.pdf]

Table S1. Additive genetic variances ( $\sigma^2_a$ ), environmental variances ( $\sigma^2_e$ ), phenotypic variances ( $\sigma^2_p$ ), heritability ( $h^2$ ), and coefficients of genetic variation ( $CV_g$ ) estimates ( $\pm$ SEs) for carcass, growth, and related feed efficiency traits using single-trait animal model in Hanwoo cattle

| Trait <sup>1</sup> | $\sigma^2_a$     | $\sigma^2_e$     | $\sigma^2_p$     | $h^2$       | $CV_g$ (%) |
|--------------------|------------------|------------------|------------------|-------------|------------|
| BT                 | 5.43 (0.59)      | 5.62 (0.47)      | 11.06 (0.25)     | 0.49 (0.05) | 26.75      |
| CW                 | 313.17 (45.24)   | 711.91 (39.12)   | 1025.10 (21.15)  | 0.31 (0.04) | 5.14       |
| EMA                | 27.04 (3.21)     | 35.34 (2.60)     | 62.38 (1.39)     | 0.43 (0.05) | 6.59       |
| MS                 | 1.50 (0.17)      | 0.97 (0.13)      | 2.47 (0.07)      | 0.61 (0.06) | 36.78      |
| ADG                | 2462.80 (338.34) | 5880.20 (293.91) | 8343.00 (164.29) | 0.30 (0.04) | 5.86       |
| MBW                | 11.85 (1.74)     | 31.64 (1.53)     | 43.49 (0.84)     | 0.27 (0.04) | 3.97       |
| YW                 | 267.37 (25.31)   | 765.09 (20.44)   | 1032.50 (13.76)  | 0.26 (0.02) | 4.78       |
| KR                 | 0.21 (0.03)      | 0.49 (0.03)      | 0.69 (0.01)      | 0.30 (0.04) | 4.69       |
| RGR                | 6.76 (0.95)      | 14.69 (0.81)     | 21.44 (0.43)     | 0.31 (0.04) | 6.47       |

<sup>1</sup> BT: backfat thickness, CW: carcass weight, EMA: eye muscle area, MS: marbling score, ADG: average daily gain, MBW: mid-test metabolic body weight, YW: yearling weight, KR: Kleiber ratio, RGR: relative growth rate.
